# Supplementary material for: Construction of multiple modes using gold nanoparticles as probes for the rapid detection of fenpyroximate
Source: Royal Society of Chemistry journal article supplement (doi:10.1039/d3ay00139c), 2023-01-01
Supplement: d3ay00139c1.pdf [file d3ay00139c1.pdf]

# 1 **Supporting Information**

## 2 **Construction of Multiple Modes Using Gold Nanoparticles as Probes** 3 **for Rapidly Detection of fenpyroximate**

4 Yumei Yan<sup>a,&</sup>, Zhili Liu<sup>a,&</sup>, Wenfeng Zhou<sup>a</sup>, Haixiang Gao<sup>a</sup>, Runhua Lu<sup>a,\*</sup>

5 <sup>a</sup> Department of Chemistry, College of Science, China Agricultural University, Yuanmingyuan West

6 Road 2#, Haidian District, Beijing 100193, China

7 <sup>&</sup> These authors contributed equally to this work and should be considered co-first authors.

8 <sup>\*</sup> Corresponding author. E-mail address: Runhua Lu [rhlu@cau.edu.cn](mailto:rhlu@cau.edu.cn)

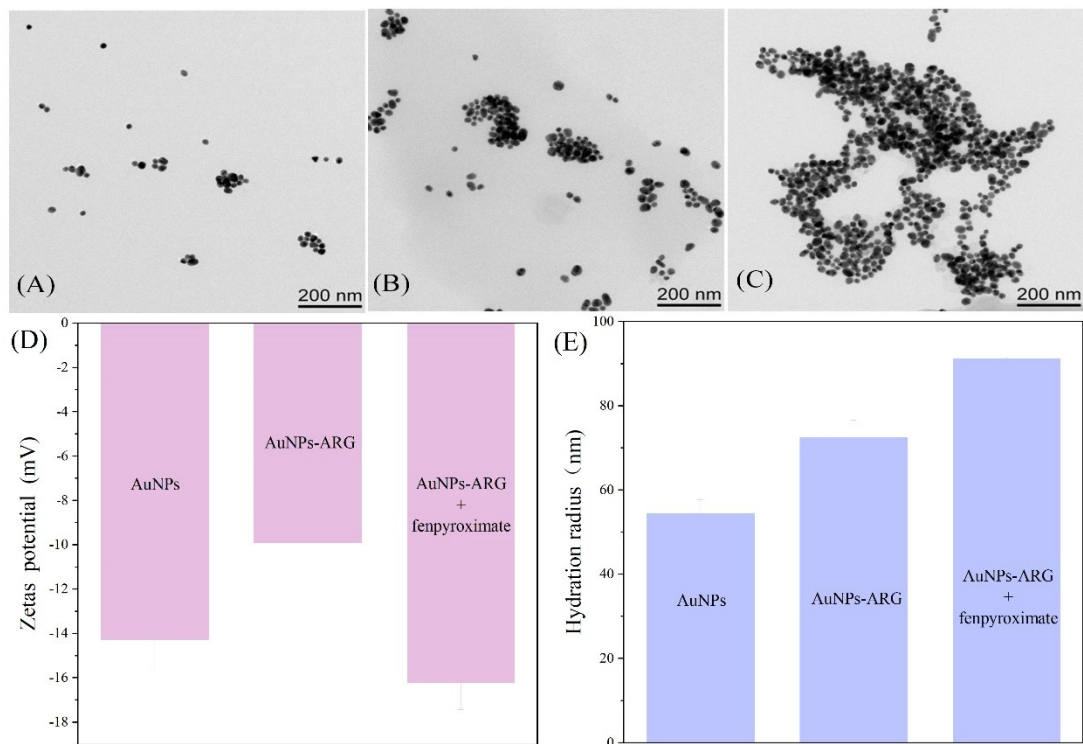

9

10 **Fig S1** Transmission electron micrographs of AuNPs (A), ARG-AuNPs (B) and ARG-  
 11 AuNPs added with fenpyroximate (C), DLS results (D) and zeta potential diagrams (E)  
 12 of nanomaterials before and after arginine modification and after adding fenpyroximate  
 13

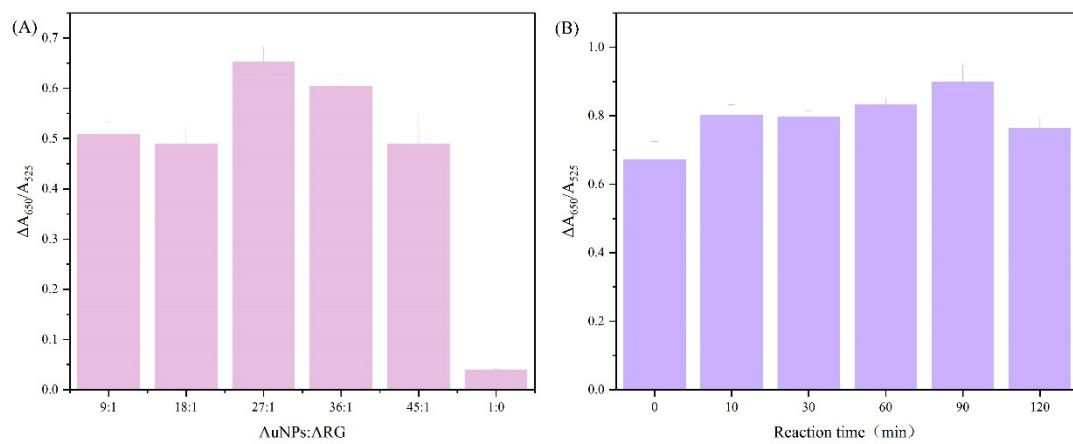

14

15 **Fig S2** Optimization of (A) volume ratio (AuNPs: ARG) and (B) reaction time in

16 material synthesis of colorimetric sensor

17

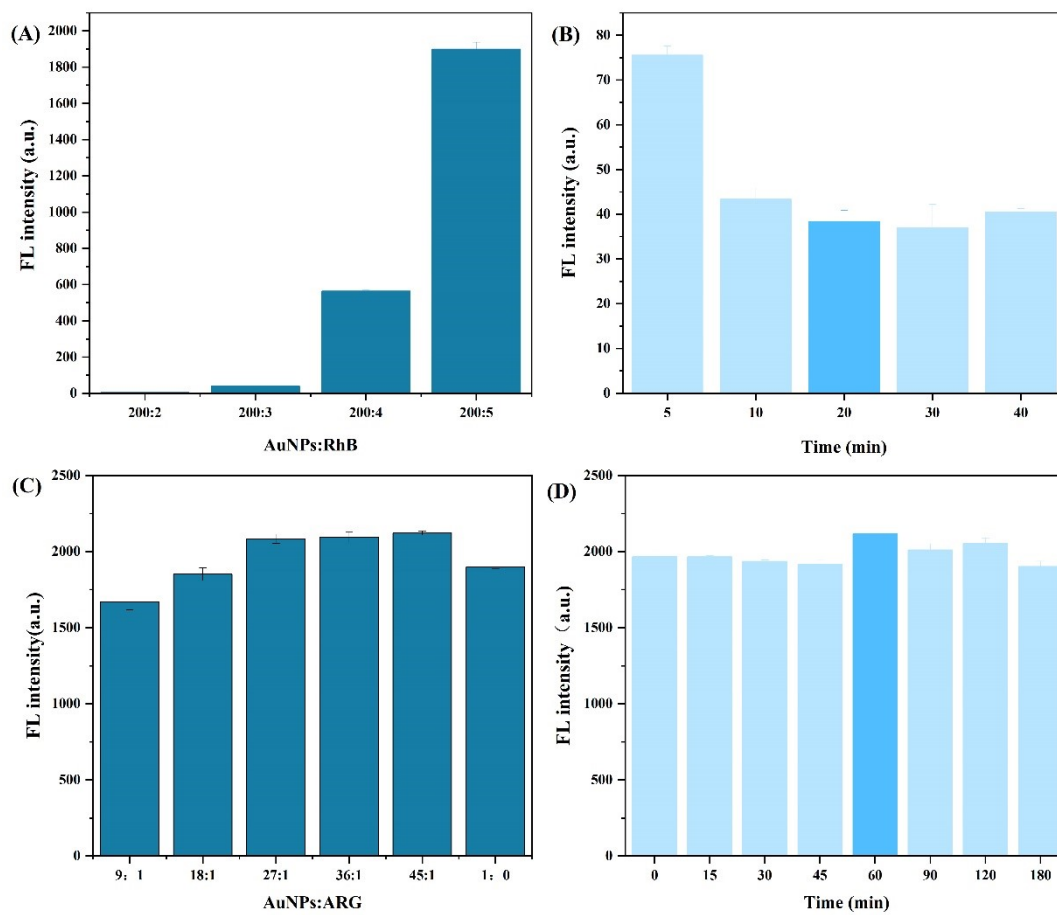

18

19 **Fig S3** Optimization of synthesis ratio (A&C) and synthesis reaction time (B&D) of

20 fluorescent probes

21 **Table S1** Three modes to detect the additive recovery results of actual samples

| Sample         | Spiked<br>(mg·L <sup>-1</sup> ) | UV spectroscopy                |                    |         | Image RGB value colorimetry    |                    |         | Fluorescence Spectroscopy      |                    |         |
|----------------|---------------------------------|--------------------------------|--------------------|---------|--------------------------------|--------------------|---------|--------------------------------|--------------------|---------|
|                |                                 | Found<br>(mg·L <sup>-1</sup> ) | Recoverie<br>s (%) | RSD (%) | Found<br>(mg·L <sup>-1</sup> ) | Recoverie<br>s (%) | RSD (%) | Found<br>(mg·L <sup>-1</sup> ) | Recoverie<br>s (%) | RSD (%) |
| river water    | 0.25                            | 0.25                           | 100.88             | 1.37    | 0.27                           | 109.34             | 5.75    | 0.25                           | 98.55              | 1.14    |
|                | 0.30                            | 0.30                           | 100.66             | 1.83    | 0.32                           | 105.62             | 4.40    | 0.28                           | 94.15              | 3.26    |
|                | 0.35                            | 0.37                           | 106.90             | 3.94    | 0.38                           | 108.69             | 7.74    | 0.35                           | 99.05              | 3.69    |
| apple<br>juice | 0.25                            | 0.27                           | 109.01             | 2.37    | 0.27                           | 109.10             | 3.66    | 0.26                           | 103.83             | 2.59    |
|                | 0.30                            | 0.33                           | 110.65             | 2.61    | 0.33                           | 108.48             | 4.73    | 0.31                           | 103.45             | 4.41    |
|                | 0.35                            | 0.38                           | 108.15             | 0.99    | 0.37                           | 105.98             | 5.88    | 0.36                           | 103.33             | 4.42    |
| pear juice     | 0.25                            | 0.25                           | 98.52              | 2.35    | 0.27                           | 108.45             | 3.74    | 0.25                           | 100.05             | 1.26    |
|                | 0.30                            | 0.32                           | 108.29             | 2.13    | 0.32                           | 106.74             | 2.81    | 0.29                           | 96.54              | 3.52    |
|                | 0.35                            | 0.38                           | 107.59             | 2.84    | 0.36                           | 102.87             | 2.00    | 0.34                           | 96.17              | 2.76    |
